# Supplementary material for: Host plants and Wolbachia shape the population genetics of sympatric herbivore populations
Source: PubMed Central journal article supplement (PMC7691456; doi:10.1111/eva.13079), 2020-09-12

**Supporting Information for:**

**Host plants and endosymbionts shape the population genetics of  
sympatric herbivore populations**

**Table of Contents:**

|                 |            |
|-----------------|------------|
| <b>Table S1</b> | Page 2-3   |
| <b>Table S2</b> | Page 4-7   |
| <b>Table S3</b> | Page 8     |
| <b>Table S4</b> | Page 9     |
| <b>Table S5</b> | Page 10    |
| <b>Table S6</b> | Page 11-12 |
| <b>Fig S1</b>   | Page 13    |

**Table S1.** Detailed sampling information

| Site name | Coordinates                   | Plant host     | # of sampling dates | # of psyllids processed |
|-----------|-------------------------------|----------------|---------------------|-------------------------|
| Day       | 44° 29' 22" N, 119° 35' 1" W  | Matrimony vine | 2                   | 20                      |
| Mit       | 44° 34' 26" N, 120° 10' 19" W | Matrimony vine | 2                   | 19                      |
| Har       | 43° 38' 41" N, 116° 12' 31" W | Matrimony vine | 2                   | 19                      |
| Eag       | 43° 43' 23" N, 116° 19' 10" W | Matrimony vine | 2                   | 19                      |
| Gra       | 42° 34' 17" N, 114° 30' 0" W  | Matrimony vine | 1                   | 5                       |
| Vale      | 43° 59' 13" N, 117° 14' 41" W | Matrimony vine | 1                   | 6                       |
| ProL      | 46° 13' 25" N, 119° 47' 24" W | Matrimony vine | 2                   | 19                      |
| Kah       | 46° 39' 22" N, 118° 29' 46" W | Matrimony vine | 2                   | 18                      |
| Pasco     | 46° 30' 6" N, 118° 47' 32" W  | Matrimony vine | 2                   | 18                      |
| Selah     | 46° 40' 45" N, 120° 31' 51" W | Matrimony vine | 2                   | 17                      |
| PuL       | 46° 43' 33" N, 117° 10' 3" W  | Matrimony vine | 2                   | 19                      |
| Lichty    | 46° 17' 40" N, 119° 57' 6" W  | Nightshade     | 2                   | 19                      |
| ProN      | 46° 14' 16" N, 119° 49' 14" W | Nightshade     | 2                   | 17                      |
| Buena     | 46° 25' 21" N, 120° 18' 24" W | Nightshade     | 2                   | 15                      |
| CX        | 46° 50' 51" N, 117° 28' 44" W | Nightshade     | 2                   | 20                      |
| Mesa      | 46° 35' 18" N, 119° 0' 1" W   | Nightshade     | 2                   | 19                      |
| FH        | 46° 59' 55" N, 119° 41' 5" W  | Nightshade     | 2                   | 19                      |
| PuN       | 46° 43' 40" N, 117° 10' 24" W | Nightshade     | 2                   | 16                      |
| BSND      | 43° 40' 10" N, 116° 28' 21" W | Nightshade     | 2                   | 15                      |
| Die       | 42° 35' 47" N, 114° 23' 20" W | Nightshade     | 1                   | 10                      |
| LB1       | 45° 52' 51" N, 119° 3' 13" W  | Nightshade     | 1                   | 9                       |
| MES_N     | 43° 58' 51" N, 117° 1' 19" W  | Nightshade     | 1                   | 10                      |
| Picabo    | 43° 18' 54" N, 114° 7' 51" W  | Nightshade     | 1                   | 8                       |
| L11       | 42° 57' 3" N, 115° 32' 41" W  | Potato         | 1                   | 4                       |
| L5        | 43° 35' 30" N, 116° 44' 35" W | Potato         | 1                   | 10                      |
| L1        | 43° 42' 43" N, 117° 0' 8" W   | Potato         | 1                   | 10                      |
| L26       | 42° 30' 6" N, 114° 26' 9" W   | Potato         | 1                   | 9                       |
| L8        | 43° 24' 40" N, 116° 38' 14" W | Potato         | 1                   | 10                      |
| L24       | 42° 35' 10" N, 114° 18' 4" W  | Potato         | 1                   | 9                       |
| L32       | 42° 30' 34" N, 114° 37' 43" W | Potato         | 1                   | 10                      |
| Tr10      | 45° 44' 53" N, 119° 9' 19" W  | Potato         | 1                   | 10                      |
| Tr5       | 45° 52' 31" N, 119° 7' 1" W   | Potato         | 1                   | 8                       |
| Tr25      | 45° 47' 5" N, 119° 48' 21" W  | Potato         | 1                   | 8                       |
| Tr16      | 45° 54' 3" N, 119° 25' 44" W  | Potato         | 1                   | 10                      |
| W8        | 46° 41' 11" N, 119° 52' 26" W | Potato         | 1                   | 10                      |
| W10       | 47° 11' 34" N, 119° 51' 11" W | Potato         | 1                   | 10                      |
| N8        | 46° 51' 14" N, 119° 4' 49" W  | Potato         | 1                   | 10                      |

|       |                               |        |   |    |
|-------|-------------------------------|--------|---|----|
| N2    | 47° 8' 41" N, 119° 3' 57" W   | Potato | 1 | 6  |
| N7    | 46° 43' 45" N, 119° 0' 15" W  | Potato | 1 | 10 |
| NC5   | 46° 55' 30" N, 119° 38' 34" W | Potato | 1 | 9  |
| S2    | 45° 56' 45" N, 119° 51' 2" W  | Potato | 1 | 9  |
| S9    | 46° 1' 35" N, 119° 18' 6" W   | Potato | 1 | 10 |
| SE2   | 46° 12' 36" N, 118° 41' 36" W | Potato | 1 | 10 |
| C4    | 46° 26' 19" N, 119° 2' 23" W  | Potato | 1 | 10 |
| C9    | 46° 28' 36" N, 119° 13' 20" W | Potato | 1 | 9  |
| MES_P | 43° 58' 51" N, 117° 1' 19" W  | Potato | 1 | 9  |

---

**Table S2** ADMIXTURE membership values (K=2), COI-haplotype, and genetic groups of the psyllid samples presented in fineRADstructure plot (N=124<sup>†</sup>)

| Sample ID  | COI-haplotype | ADMIXTURE<br>K=2 <sup>‡</sup> | Genetic group    | Position in<br>FineRADstructure |
|------------|---------------|-------------------------------|------------------|---------------------------------|
| LB12       | western       | 0.6778                        | W genetic group  | lower square                    |
| W82        | western       | 0.7238                        | W genetic group  | lower square                    |
| NC55       | western       | 0.6946                        | W genetic group  | lower square                    |
| L24_6      | western       | 0.6996                        | W genetic group  | lower square                    |
| CX_Sep_5   | western       | 0.7571                        | W genetic group  | lower square                    |
| SE28       | western       | 0.723                         | W genetic group  | lower square                    |
| Selah_Sep8 | western       | 0.777                         | W genetic group  | lower square                    |
| S92        | western       | 0.7616                        | W genetic group  | lower square                    |
| LB11       | western       | 0.6976                        | W genetic group  | lower square                    |
| LB15       | western       | 0.7058                        | W genetic group  | lower square                    |
| S22        | western       | 0.7423                        | W genetic group  | lower square                    |
| C44        | western       | 0.7332                        | W genetic group  | lower square                    |
| ProL_May5  | western       | 0.7299                        | W genetic group  | lower square                    |
| Day_Jul_2  | western       | 0.7465                        | W genetic group  | lower square                    |
| ProL_Sep1  | western       | 0.7441                        | W genetic group  | lower square                    |
| L26_3      | western       | 0.7242                        | W genetic group  | lower square                    |
| C48        | western       | 0.7364                        | W genetic group  | lower square                    |
| Har_Jun_4  | western       | 0.5239                        | W genetic group  | lower square                    |
| Mit_Sep_2  | western       | 0.5787                        | W genetic group  | lower square                    |
| Mit_Jul_9  | northwestern  | 0.5109                        | W genetic group  | lower square                    |
| ProL_May1  | northwestern  | 0.5255                        | W genetic group  | lower square                    |
| Kah_May2   | western       | 0.529                         | W genetic group  | lower square                    |
| Kah_May5   | western       | 0.5468                        | W genetic group  | lower square                    |
| Pasco_May9 | western       | 0.5499                        | W genetic group  | lower square                    |
| Pasco_May3 | western       | 0.5044                        | W genetic group  | lower square                    |
| Day_Jul_1  | western       | 0.4998                        | NW genetic group | lower square                    |
| Day_Jul_3  | western       | 0.5621                        | W genetic group  | lower square                    |
| Day_Jul_7  | western       | 0.5184                        | W genetic group  | lower square                    |
| Mit_Jul_10 | western       | 0.5382                        | W genetic group  | lower square                    |
| Mit_Jul_1  | western       | 0.5422                        | W genetic group  | lower square                    |
| NC51       | western       | 0.5643                        | W genetic group  | lower square                    |
| Day_Jul_6  | western       | 0.6331                        | W genetic group  | lower square                    |
| LB17       | western       | 0.6325                        | W genetic group  | lower square                    |
| L8_3       | western       | 0.6267                        | W genetic group  | lower square                    |
| W87        | western       | 0.6174                        | W genetic group  | lower square                    |
| NC54       | western       | 0.653                         | W genetic group  | lower square                    |

|            |         |        |                  |              |
|------------|---------|--------|------------------|--------------|
| Tr169      | western | 0.5858 | W genetic group  | lower square |
| Tr167      | western | 0.6802 | W genetic group  | lower square |
| Mit_Jul_3  | western | 0.6675 | W genetic group  | lower square |
| Pasco_May8 | western | 0.617  | W genetic group  | lower square |
| Selah_May3 | western | 0.7013 | W genetic group  | lower square |
| Selah_Sep4 | western | 0.6457 | W genetic group  | lower square |
| Mit_Sep_6  | western | 0.6025 | W genetic group  | lower square |
| ProL_May7  | western | 0.6149 | W genetic group  | lower square |
| Pasco_May5 | western | 0.5935 | W genetic group  | lower square |
| Tr166      | western | 0.6019 | W genetic group  | lower square |
| L5_3       | western | 0.8324 | W genetic group  | lower square |
| LB18       | western | 0.8096 | W genetic group  | lower square |
| N74        | western | 0.8192 | W genetic group  | lower square |
| L1_7       | western | 0.9903 | W genetic group  | lower square |
| MES_P9     | western | 0.9166 | W genetic group  | lower square |
| N89        | western | 0.9616 | W genetic group  | lower square |
| SE26       | western | 0.885  | W genetic group  | lower square |
| Tr162      | western | 0.9555 | W genetic group  | lower square |
| Pasco_May2 | western | 0.9276 | W genetic group  | lower square |
| SE210      | western | 0.9729 | W genetic group  | lower square |
| Kah_Sep4   | western | 0.9287 | W genetic group  | lower square |
| W86        | western | 0.9715 | W genetic group  | lower square |
| S93        | western | 0.9637 | W genetic group  | lower square |
| Kah_Sep2   | western | 0.9034 | W genetic group  | lower square |
| S99        | western | 0.9986 | W genetic group  | lower square |
| L24_3      | western | 0.8447 | W genetic group  | lower square |
| C47        | western | 0.9501 | W genetic group  | lower square |
| Har_Sep_9  | western | 0.9125 | W genetic group  | lower square |
| ProL_May3  | western | 0.9126 | W genetic group  | lower square |
| Pasco_Sep3 | western | 0.92   | W genetic group  | lower square |
| Tr58       | western | 0.8261 | W genetic group  | lower square |
| Day_Sep_2  | western | 0.8583 | W genetic group  | lower square |
| S97        | western | 0.9002 | W genetic group  | lower square |
| Day_Sep_8  | western | 0.9614 | W genetic group  | lower square |
| L8_8       | western | 1      | W genetic group  | lower square |
| Kah_Sep1   | western | 1      | W genetic group  | lower square |
| L26_5      | western | 1      | W genetic group  | lower square |
| W109       | western | 1      | W genetic group  | lower square |
| Tr101      | western | 1      | W genetic group  | lower square |
| CX_Sep_1   | western | 0.2449 | NW genetic group | upper square |
| CX_Sep_6   | western | 0.3027 | NW genetic group | upper square |

|              |              |        |                  |              |
|--------------|--------------|--------|------------------|--------------|
| CX_Sep_3     | western      | 0.2303 | NW genetic group | upper square |
| Eag_Jun_6    | western      | 0.2082 | NW genetic group | upper square |
| Har_Sep_5    | northwestern | 0.2574 | NW genetic group | upper square |
| Selah_Sep1   | northwestern | 0.2219 | NW genetic group | upper square |
| Har_Jun_3    | northwestern | 0.2184 | NW genetic group | upper square |
| Har_Jun_9    | northwestern | 0.2121 | NW genetic group | upper square |
| Har_Jun_10   | northwestern | 0.1858 | NW genetic group | upper square |
| Buena_Jun_3  | northwestern | 0.1836 | NW genetic group | upper square |
| Eag_Sep_5    | northwestern | 0.1991 | NW genetic group | upper square |
| ProN_Sep_5   | northwestern | 0.2317 | NW genetic group | upper square |
| Selah_May1   | northwestern | 0.1403 | NW genetic group | upper square |
| Selah_Sep7   | northwestern | 0.2113 | NW genetic group | upper square |
| Mit_Jul_5    | western      | 0.4595 | NW genetic group | upper square |
| W101         | western      | 0.4201 | NW genetic group | upper square |
| ProL_May9    | western      | 0.4194 | NW genetic group | upper square |
| Pasco_May1   | western      | 0.4908 | NW genetic group | upper square |
| Kah_May6     | western      | 0.4149 | NW genetic group | upper square |
| Pasco_May4   | northwestern | 0.465  | NW genetic group | upper square |
| CX_Sep_2     | western      | 0.5089 | W genetic group  | upper square |
| CX_Sep_10    | northwestern | 0.4613 | NW genetic group | upper square |
| Kah_May10    | western      | 0.3689 | NW genetic group | upper square |
| Tr164        | western      | 0.3136 | NW genetic group | upper square |
| Har_Jun_5    | northwestern | 0.2976 | NW genetic group | upper square |
| Selah_May7   | western      | 0.3477 | NW genetic group | upper square |
| Buena_Sep_3  | northwestern | 0.0966 | NW genetic group | upper square |
| Lichty_Sep_5 | western      | 0.0929 | NW genetic group | upper square |
| ProN_Sep_3   | western      | 0.1135 | NW genetic group | upper square |
| BSND_Jun_3   | northwestern | 0      | NW genetic group | upper square |
| Picabo3      | western      | 0.0876 | NW genetic group | upper square |
| Har_Jun_2    | western      | 0.0756 | NW genetic group | upper square |
| Picabo8      | northwestern | 0.0104 | NW genetic group | upper square |
| Eag_Jun_8    | northwestern | 0.0378 | NW genetic group | upper square |
| W105         | western      | 0.1038 | NW genetic group | upper square |
| Selah_May5   | northwestern | 0.0455 | NW genetic group | upper square |
| Buena_Sep_1  | northwestern | 0.0375 | NW genetic group | upper square |
| Lichty_Jun_1 | northwestern | 0.0462 | NW genetic group | upper square |
| Buena_Sep_10 | northwestern | 0.0014 | NW genetic group | upper square |
| ProN_Jun_1   | northwestern | 0      | NW genetic group | upper square |
| Lichty_Sep_6 | western      | 0      | NW genetic group | upper square |
| FH_Jul_4     | northwestern | 0      | NW genetic group | upper square |
| ProN_Jun_9   | northwestern | 0.0295 | NW genetic group | upper square |

|            |              |        |                  |              |
|------------|--------------|--------|------------------|--------------|
| FH_Sep_5   | northwestern | 0      | NW genetic group | upper square |
| Selah_Sep6 | northwestern | 0.0553 | NW genetic group | upper square |
| Die_Jun_4  | northwestern | 0      | NW genetic group | upper square |
| Mit_Jul_6  | northwestern | 0.015  | NW genetic group | upper square |
| PuN_Sep_6  | northwestern | 0      | NW genetic group | upper square |
| PuL_May7   | northwestern | 0      | NW genetic group | upper square |

†The order of the samples was in corresponding order of samples from left to right in Fig. 4B.

‡samples with ADMIXTRUE K > 0.5 was designated as W genetic group, otherwise NW genetic group.

**Table S3.** Results of multiple matrix regression with randomization (MMRR)

| <b>Individual explainable variable</b> |                    |                      |                    |                     |                     |                          |
|----------------------------------------|--------------------|----------------------|--------------------|---------------------|---------------------|--------------------------|
|                                        | Host plant         |                      | COI-haplotype      |                     | Geographic distance |                          |
| <b>r-squared</b>                       | 0.226              |                      | 0.652              |                     | 0.018               |                          |
| <b>coefficient</b>                     | Intercept<br>0.000 | Host plant<br>0.570  | Intercept<br>0.000 | haplotype<br>0.808  | Intercept<br>0.000  | Geo<br>distance<br>0.135 |
| <b>t-statistics</b>                    | Intercept<br>0.000 | Host plant<br>19.820 | Intercept<br>0.000 | haplotype<br>39.182 | Intercept<br>0.000  | Geo<br>distance<br>3.887 |
| <b>t-pvalue</b>                        | Intercept<br>0.001 | Host plant<br>0.001  | Intercept<br>0.001 | haplotype<br>0.001  | Intercept<br>0.429  | Geo<br>distance<br>0.052 |
| <b>F-statistic</b>                     | 238.7618           |                      | 1535.252           |                     | 15.107              |                          |
| <b>p-value</b>                         | 0.001              |                      | 0.001              |                     | 0.052               |                          |

**Methods for MMRR:**

Following the instructions in Wang (2013), we picked populations that had sample size  $\geq 8$ , consistent with our  $F_{ST}$  estimation (see main manuscript). Given that we were only considering the explainable variables of geographic distance, host plants, and haplotypes, we merged psyllids that were collected at two time points from the same location into one population. For host plants, we created a matrix with the following distance designation: a pair of populations from the same host=0, a pair of populations from different hosts = 1. For haplotype matrix, if a population had comparable numbers of both W and NW haplotyped individuals, that population was excluded. This criterion excluded four populations. To create a haplotype matrix, we used the following designation, a pair of populations of the same haplotype = 0, a pair of populations with different haplotypes = 1 (only two haplotypes, NW and W were used here). Geographic distance was calculated using R package geodist.  $F_{ST}$  was calculated with R package StAMPP.



**Table S4.**  $F_{ST}$  of non-crop host sites with two sampling points

| Sampling site | $F_{ST}$ | Host           | Region             | % of NW genetic group in pre-season | % of NW genetic group in post-season |
|---------------|----------|----------------|--------------------|-------------------------------------|--------------------------------------|
| BSND          | -0.003   | Nightshade     | Snake River Plain  | 100.0%                              | 90.0%                                |
| Buena         | -0.013   | Nightshade     | Columbia Basin     | 100.0%                              | 100.0%                               |
| Day           | 0.034*   | Matrimony vine | Non-growing region | 0.0%                                | 0.0%                                 |
| Eag           | 0.123*   | Matrimony vine | Snake River Plain  | 100.0%                              | 25.0%                                |
| FH            | -0.008   | Nightshade     | Columbia Basin     | 100.0%                              | 100.0%                               |
| Har           | 0.089*   | Matrimony vine | Snake River Plain  | 90.0%                               | 28.6%                                |
| Kah           | 0.039*   | Matrimony vine | Columbia Basin     | 25.0%                               | 0.0%                                 |
| Lichty        | 0.05*    | Nightshade     | Columbia Basin     | 100.0%                              | 100.0%                               |
| Mesa          | -0.004   | Nightshade     | Columbia Basin     | 100.0%                              | 90.0%                                |
| Mit           | 0.056*   | Matrimony vine | Non-growing region | 30.0%                               | 0.0%                                 |
| Pasco         | 0.027*   | Matrimony vine | Columbia Basin     | 12.5%                               | 0.0%                                 |
| ProL          | 0.013*   | Matrimony vine | Columbia Basin     | 11.1%                               | 0.0%                                 |
| ProN          | 0.012*   | Nightshade     | Columbia Basin     | 100.0%                              | 100.0%                               |
| PuL           | 0.015*   | Matrimony vine | Non-growing region | 100.0%                              | 77.8%                                |
| PuN           | 0.039*   | Nightshade     | Non-growing region | 100.0%                              | 100.0%                               |
| Selah         | 0.047*   | Matrimony vine | Columbia Basin     | 87.5%                               | 37.5%                                |

\*indicates the  $F_{ST}$  value was significant ( $p < 0.05$ ) between pre- and post-season populations of that sampling site from 500 bootstraps.

**Table S5.** BLAST results of seven unique strains of microbiome associated with *Bactericera cockerelli* samples

| Seq ID                  | Family             | Genus                        | species          | Top match to genes in GenBank (GenBank ID)                                                                    | Identity |
|-------------------------|--------------------|------------------------------|------------------|---------------------------------------------------------------------------------------------------------------|----------|
| <i>W. pipientis</i> -1  | Anaplasmataceae    | <i>Wolbachia</i>             | <i>pipientis</i> | <i>Wolbachia pipientis</i> 16S ribosomal RNA gene (AF501664.1)                                                | 100%     |
| <i>W. pipientis</i> -2* | Anaplasmataceae    | <i>Wolbachia</i>             | <i>pipientis</i> | <i>Wolbachia</i> sp. isolate 37_NW2_EstivaGerbiSP 16S ribosomal RNA gene (MG977008.1)                         | 100%     |
| C. ruddii-1             | NA                 | <i>Candidatus Carsonella</i> | <i>ruddii</i>    | <i>Candidatus Carsonella ruddii</i> clone 2 16S ribosomal RNA gene, partial sequence (KR045612.1)             | 100%     |
| C. ruddii-2#            | NA                 | <i>Candidatus Carsonella</i> | <i>ruddii</i>    | <i>Carsonella ruddii</i> natural-host <i>Bactericera cockerelli</i> tryptophanyl-tRNA synthetase (AF211126.2) | 99.75%   |
| Entero-1                | Enterobacteriaceae | unknown                      | unknown          | Secondary endosymbiont of <i>Bactericera cockerelli</i> 16S ribosomal RNA gene ( <sup>1</sup> AF263557.1)     | 100%     |
| Entero-2                | Enterobacteriaceae | unknown                      | unknown          | Secondary endosymbiont of <i>Bactericera cockerelli</i> 16S ribosomal RNA gene ( <sup>1</sup> AF263557.1)     | 99.5%    |
| Entero-3                | Enterobacteriaceae | unknown                      | unknown          | Secondary endosymbiont of <i>Ctenarytaina eucalypti</i> , complete genome ( <sup>2</sup> CP003546.1)          | 94.83%   |

\* *W. pipientis*-2 is one nucleotide different from *W. pipientis*-1

# *C. ruddii*-2 is three nucleotides different from *C. ruddii*-1

<sup>1</sup> AF263557.1 was derived from a secondary endosymbiont of *Bactericera cockerelli* without further taxonomic information available (Thao et al. 2000).

<sup>2</sup> CP003546.1 was a sequence derived from a secondary endosymbiont of *Ctenarytaina eucalypti* (blue gum psyllids) that was not further classified (Sloan & Moran, 2008)

Sloan DB, Moran NA. 2012. Genome reduction and co-evolution between the primary and secondary bacterial symbionts of psyllids. *Molecular Biology and Evolution* 29(12):3781–3792. doi:10.1093/molbev/mss180

Thao ML, Clark MA, Baumann L, Brennan EB, Moran NA, Baumann P. 2000. Secondary endosymbionts of psyllids have been acquired multiple times. *Current Microbiology* 41(4):300–304. doi:10.1007/s002840010138

**Table S6.** Relative abundance of bacteria that were associated with 77 potato psyllid samples

| Sample.ID  | Host | COI.hap | Genetic group | tax1# | tax2  | tax3  | tax4  | tax5  | tax6  | tax7  | other taxa |
|------------|------|---------|---------------|-------|-------|-------|-------|-------|-------|-------|------------|
| Selah_May1 | M    | NW      | NW ADM        | 0     | 0     | 0.056 | 0     | 0     | 0.863 | 0.036 | 0.045      |
| Selah_May2 | M    | NW      | NW ADM        | 0     | 0     | 0.159 | 0     | 0     | 0.706 | 0.120 | 0.015      |
| Selah_May4 | M    | NW      | NW ADM        | 0     | 0     | 0.123 | 0     | 0     | 0.656 | 0.220 | 0.001      |
| Selah_May6 | M    | NW      | NW ADM        | 0     | 0     | 0.111 | 0     | 0     | 0.784 | 0.104 | 0.001      |
| Selah_May9 | M    | NW      | NW ADM        | 0     | 0     | 0.201 | 0     | 0     | 0.764 | 0.033 | 0.002      |
| Selah_Sep1 | M    | NW      | NW ADM        | 0     | 0     | 0.176 | 0     | 0     | 0.624 | 0.198 | 0.002      |
| Selah_Sep6 | M    | NW      | NW ADM        | 0     | 0     | 0.471 | 0     | 0     | 0.410 | 0.110 | 0.009      |
| PuL_May2   | M    | NW      | NW ADM        | 0     | 0     | 0.159 | 0     | 0     | 0.745 | 0.088 | 0.008      |
| PuL_May3   | M    | NW      | NW ADM        | 0     | 0     | 0.106 | 0     | 0     | 0.780 | 0.107 | 0.007      |
| PuL_May4   | M    | NW      | NW ADM        | 0     | 0     | 0.182 | 0     | 0     | 0.653 | 0.152 | 0.014      |
| PuL_May5   | M    | NW      | NW ADM        | 0     | 0     | 0.193 | 0     | 0     | 0.729 | 0.072 | 0.006      |
| PuL_May6   | M    | NW      | NW ADM        | 0     | 0     | 0.115 | 0     | 0     | 0.824 | 0.045 | 0.015      |
| PuL_May7   | M    | NW      | NW ADM        | 0     | 0     | 0.132 | 0     | 0     | 0.790 | 0.073 | 0.004      |
| PuL_May8   | M    | NW      | NW ADM        | 0     | 0     | 0.196 | 0     | 0     | 0.693 | 0.111 | 0.001      |
| Pasco_Ma4  | M    | NW      | NW ADM        | 0     | 0     | 0.191 | 0     | 0     | 0.684 | 0.123 | 0.001      |
| PuL_Aug1   | M    | NW      | NW ADM        | 0     | 0     | 0.094 | 0     | 0     | 0.760 | 0.001 | 0.144      |
| PuL_Aug4   | M    | NW      | NW ADM        | 0     | 0     | 0.085 | 0     | 0     | 0.569 | 0.341 | 0.005      |
| PuN_Jul5   | N    | NW      | NW ADM        | 0     | 0     | 0.139 | 0     | 0     | 0.834 | 0.025 | 0.001      |
| PuN_Sep6   | N    | NW      | NW ADM        | 0     | 0     | 0.144 | 0     | 0     | 0.824 | 0.026 | 0.006      |
| PuN_Sep8   | N    | NW      | NW ADM        | 0     | 0     | 0.100 | 0     | 0     | 0.801 | 0.089 | 0.011      |
| PuN_Sep9   | N    | NW      | NW ADM        | 0     | 0     | 0.215 | 0     | 0     | 0.741 | 0.036 | 0.008      |
| Eag_Jun_1  | M    | NW      | NW ADM        | 0     | 0     | 0.168 | 0     | 0     | 0.734 | 0.096 | 0.002      |
| Eag_Jun_8  | M    | NW      | NW ADM        | 0     | 0     | 0.134 | 0     | 0     | 0.856 | 0     | 0.009      |
| Pasco_Sep3 | M    | W       | W ADM         | 0.616 | 0.009 | 0     | 0.018 | 0.308 | 0     | 0.022 | 0.027      |
| Pasco_Sep4 | M    | W       | W ADM         | 0.602 | 0.009 | 0     | 0.024 | 0.336 | 0     | 0.014 | 0.014      |
| Pasco_Sep5 | M    | W       | W ADM         | 0.901 | 0     | 0     | 0.011 | 0.070 | 0     | 0.008 | 0.010      |
| Pasco_Sep7 | M    | W       | W ADM         | 0.782 | 0.012 | 0     | 0.012 | 0.153 | 0     | 0.017 | 0.025      |
| Pasco_Sep8 | M    | W       | W ADM         | 0.902 | 0     | 0     | 0.028 | 0.037 | 0     | 0.011 | 0.023      |
| Pasco_Sep9 | M    | W       | W ADM         | 0.609 | 0     | 0     | 0.025 | 0.355 | 0     | 0.002 | 0.009      |
| Selah_May3 | M    | W       | W ADM         | 0.915 | 0.013 | 0     | 0.018 | 0.013 | 0     | 0.025 | 0.016      |
| Pasco_Ma2  | M    | W       | W ADM         | 0.807 | 0.014 | 0     | 0.064 | 0.099 | 0     | 0.004 | 0.012      |
| Selah_Sep3 | M    | W       | W ADM         | 0.693 | 0.010 | 0     | 0.027 | 0.258 | 0     | 0.002 | 0.009      |
| Selah_Sep5 | M    | W       | W ADM         | 0.411 | 0     | 0     | 0.048 | 0.495 | 0     | 0.034 | 0.012      |
| Mit_Jul_2  | M    | W       | W ADM         | 0.722 | 0     | 0     | 0.042 | 0.213 | 0     | 0.003 | 0.019      |
| W105       | P    | W       | NW ADM        | 0     | 0     | 0.080 | 0     | 0     | 0.852 | 0.058 | 0.009      |
| Mit_Jul_5  | M    | W       | W ADM         | 0.959 | 0.016 | 0     | 0.004 | 0.008 | 0     | 0.001 | 0.012      |
| Mit_Sep_1  | M    | W       | W ADM         | 0.913 | 0.014 | 0     | 0.006 | 0.051 | 0     | 0.011 | 0.006      |
| Pasco_Ma3  | M    | W       | W ADM         | 0.877 | 0.015 | 0     | 0.090 | 0.001 | 0     | 0.001 | 0.015      |
| Mit_Sep2   | M    | W       | W ADM         | 0.716 | 0.011 | 0     | 0.020 | 0.216 | 0     | 0.030 | 0.008      |
| Mit_Sep4   | M    | W       | W ADM         | 0.877 | 0.014 | 0     | 0.011 | 0.086 | 0     | 0.005 | 0.007      |

|             |   |   |        |       |       |   |       |       |   |       |       |
|-------------|---|---|--------|-------|-------|---|-------|-------|---|-------|-------|
| Mit_Sep6    | M | W | W ADM  | 0.704 | 0.010 | 0 | 0.012 | 0.225 | 0 | 0.041 | 0.009 |
| PuL_Aug3    | M | W | W ADM  | 0.899 | 0     | 0 | 0.004 | 0.082 | 0 | 0.008 | 0.007 |
| C92         | P | W | W ADM  | 0.973 | 0     | 0 | 0.023 | 0     | 0 | 0     | 0.004 |
| C95         | P | W | W ADM  | 0.882 | 0     | 0 | 0.006 | 0.100 | 0 | 0.005 | 0.008 |
| Eag_Jun6    | M | W | NW ADM | 0.964 | 0     | 0 | 0.016 | 0.019 | 0 | 0     | 0.001 |
| LB16        | N | W | W ADM  | 0.697 | 0     | 0 | 0.080 | 0.203 | 0 | 0.014 | 0.005 |
| MES_N3      | N | W | W ADM  | 0.821 | 0     | 0 | 0.031 | 0.124 | 0 | 0.016 | 0.008 |
| MES_N4      | N | W | W ADM  | 0.767 | 0     | 0 | 0.058 | 0.138 | 0 | 0.028 | 0.009 |
| MES_N7      | N | W | W ADM  | 0.854 | 0.014 | 0 | 0.009 | 0.116 | 0 | 0     | 0.007 |
| L24_6       | P | W | W ADM  | 0.893 | 0     | 0 | 0.012 | 0.087 | 0 | 0.008 | 0.001 |
| Tr165       | P | W | W ADM  | 0.757 | 0.012 | 0 | 0.030 | 0.190 | 0 | 0.003 | 0.008 |
| Pasco_Ma7   | M | W | W ADM  | 0.798 | 0.013 | 0 | 0.036 | 0.119 | 0 | 0.015 | 0.019 |
| Tr166       | P | W | W ADM  | 0.001 | 0     | 0 | 0.200 | 0.758 | 0 | 0.035 | 0.006 |
| Tr167       | P | W | W ADM  | 0.824 | 0     | 0 | 0.012 | 0.152 | 0 | 0.004 | 0.009 |
| Tr169       | P | W | W ADM  | 0.001 | 0     | 0 | 0.159 | 0.806 | 0 | 0.033 | 0.002 |
| W109        | P | W | W ADM  | 0.777 | 0     | 0 | 0.020 | 0.186 | 0 | 0.008 | 0.010 |
| C91         | P | W | W ADM  | 0.757 | 0     | 0 | 0.024 | 0.203 | 0 | 0.007 | 0.009 |
| MES_P5      | P | W | W ADM  | 0.880 | 0     | 0 | 0.011 | 0.102 | 0 | 0.002 | 0.006 |
| L5_2        | P | W | W ADM  | 0.886 | 0     | 0 | 0.028 | 0.073 | 0 | 0.010 | 0.002 |
| L5_3        | P | W | W ADM  | 0.866 | 0     | 0 | 0.012 | 0.110 | 0 | 0.005 | 0.007 |
| L5_4        | P | W | W ADM  | 0.891 | 0     | 0 | 0.007 | 0.094 | 0 | 0.006 | 0.002 |
| Lichty_Jun6 | N | W | NW ADM | 0.831 | 0     | 0 | 0.005 | 0.126 | 0 | 0     | 0.039 |
| L5_5        | P | W | W ADM  | 0.794 | 0     | 0 | 0.014 | 0.185 | 0 | 0     | 0.007 |
| L5_6        | P | W | W ADM  | 0.781 | 0     | 0 | 0.018 | 0.191 | 0 | 0.002 | 0.008 |
| L24_3       | P | W | W ADM  | 0.954 | 0     | 0 | 0.014 | 0.027 | 0 | 0.003 | 0.002 |
| L24_4       | P | W | W ADM  | 0.829 | 0     | 0 | 0.032 | 0.132 | 0 | 0.002 | 0.006 |
| L24_5       | P | W | W ADM  | 0.764 | 0     | 0 | 0.008 | 0.223 | 0 | 0     | 0.005 |
| L24_7       | P | W | W ADM  | 0.878 | 0     | 0 | 0.005 | 0.108 | 0 | 0.005 | 0.004 |
| L24_8       | P | W | W ADM  | 0.823 | 0     | 0 | 0.005 | 0.156 | 0 | 0.010 | 0.006 |
| L249        | P | W | W ADM  | 0.827 | 0     | 0 | 0.014 | 0.141 | 0 | 0.012 | 0.006 |
| Pasco_Ma9   | M | W | W ADM  | 0.002 | 0     | 0 | 0.498 | 0.334 | 0 | 0.153 | 0.013 |
| Pasco_Sep1  | M | W | W ADM  | 0.663 | 0.011 | 0 | 0.021 | 0.280 | 0 | 0.008 | 0.018 |
| Pasco_Ma6   | M | W | NA*    | 0.764 | 0.012 | 0 | 0.020 | 0.177 | 0 | 0.013 | 0.014 |
| L5_8        | P | W | NA*    | 0.941 | 0     | 0 | 0.023 | 0.020 | 0 | 0.012 | 0.003 |
| L5_9        | P | W | NA*    | 0.610 | 0     | 0 | 0.023 | 0.109 | 0 | 0.012 | 0.246 |
| MES_P8      | P | W | NA*    | 0.808 | 0     | 0 | 0.030 | 0.145 | 0 | 0.017 | 0.001 |
| Pasco_Sep2  | M | W | NA*    | 0.732 | 0.011 | 0 | 0.014 | 0.214 | 0 | 0.013 | 0.016 |

\*Indicates samples without genotyping information due to low quality reads

# taxon 1 to 7 were *W. pipientis*-1, *W. pipientis*-2, *C. ruddii*-1, *C. ruddii*-2, Entero-1, Entero-2, and Entero-3 respectively; other taxa were low abundance taxa that fell out the filtering criteria (see main text).

**Fig S1.**  $f_3$  statistic indicating individual hybrids (y; W ADMIXTURE genetic group, NW ADMIXTURE genetic group). Negative  $f_3$  indicates that individual y is admixed between two source populations (putative introduced and resident populations). Colors represent host plants from which potato psyllid samples were collected. Error bars represent standard errors. \*indicates six individuals were also flagged as possible hybrids from at least one of the three tests: fineRADstructure, ADMIXTURE, and PCA.

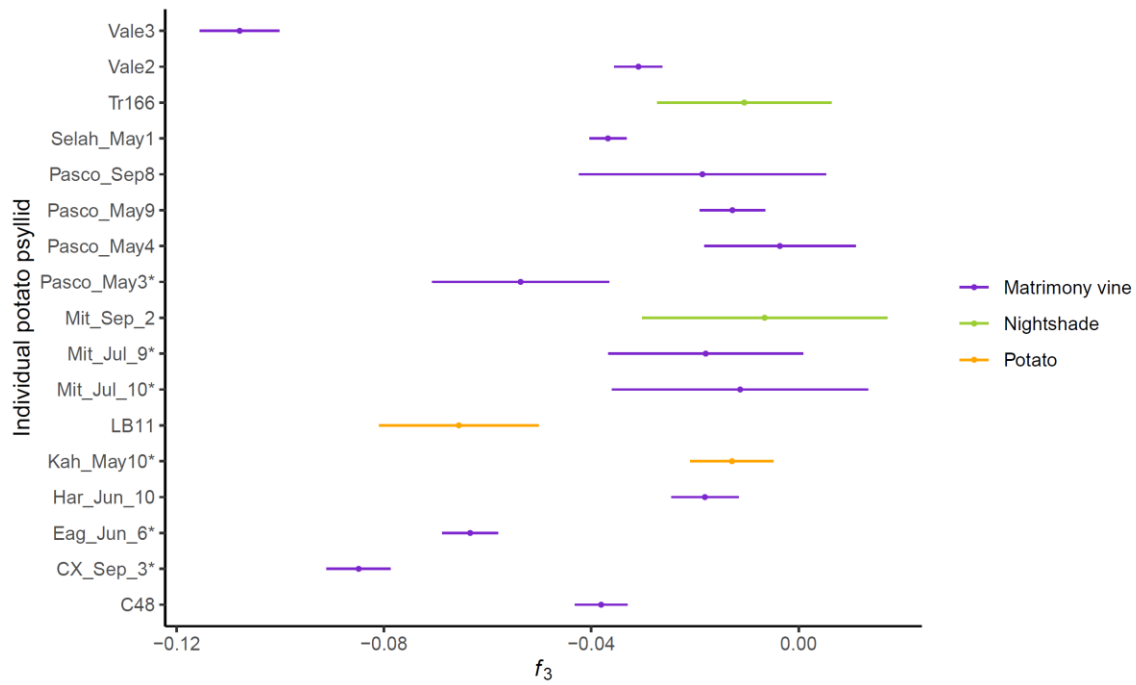

Supplement: EVA-13-2740-s001.pdf [file EVA-13-2740-s001.pdf]
